# Supplementary material for: Rapid Automated Screening for SARS-CoV-2 B.1.617 Lineage Variants (Delta/Kappa) through a Versatile Toolset of qPCR-Based SNP Detection
Source: MDPI journal article supplement (doi:10.3390/diagnostics11101818), 2021-10-01
Supplement: s1 [file s1]

# Supplementary figure S1

E484K/Q Assay (3 probes)

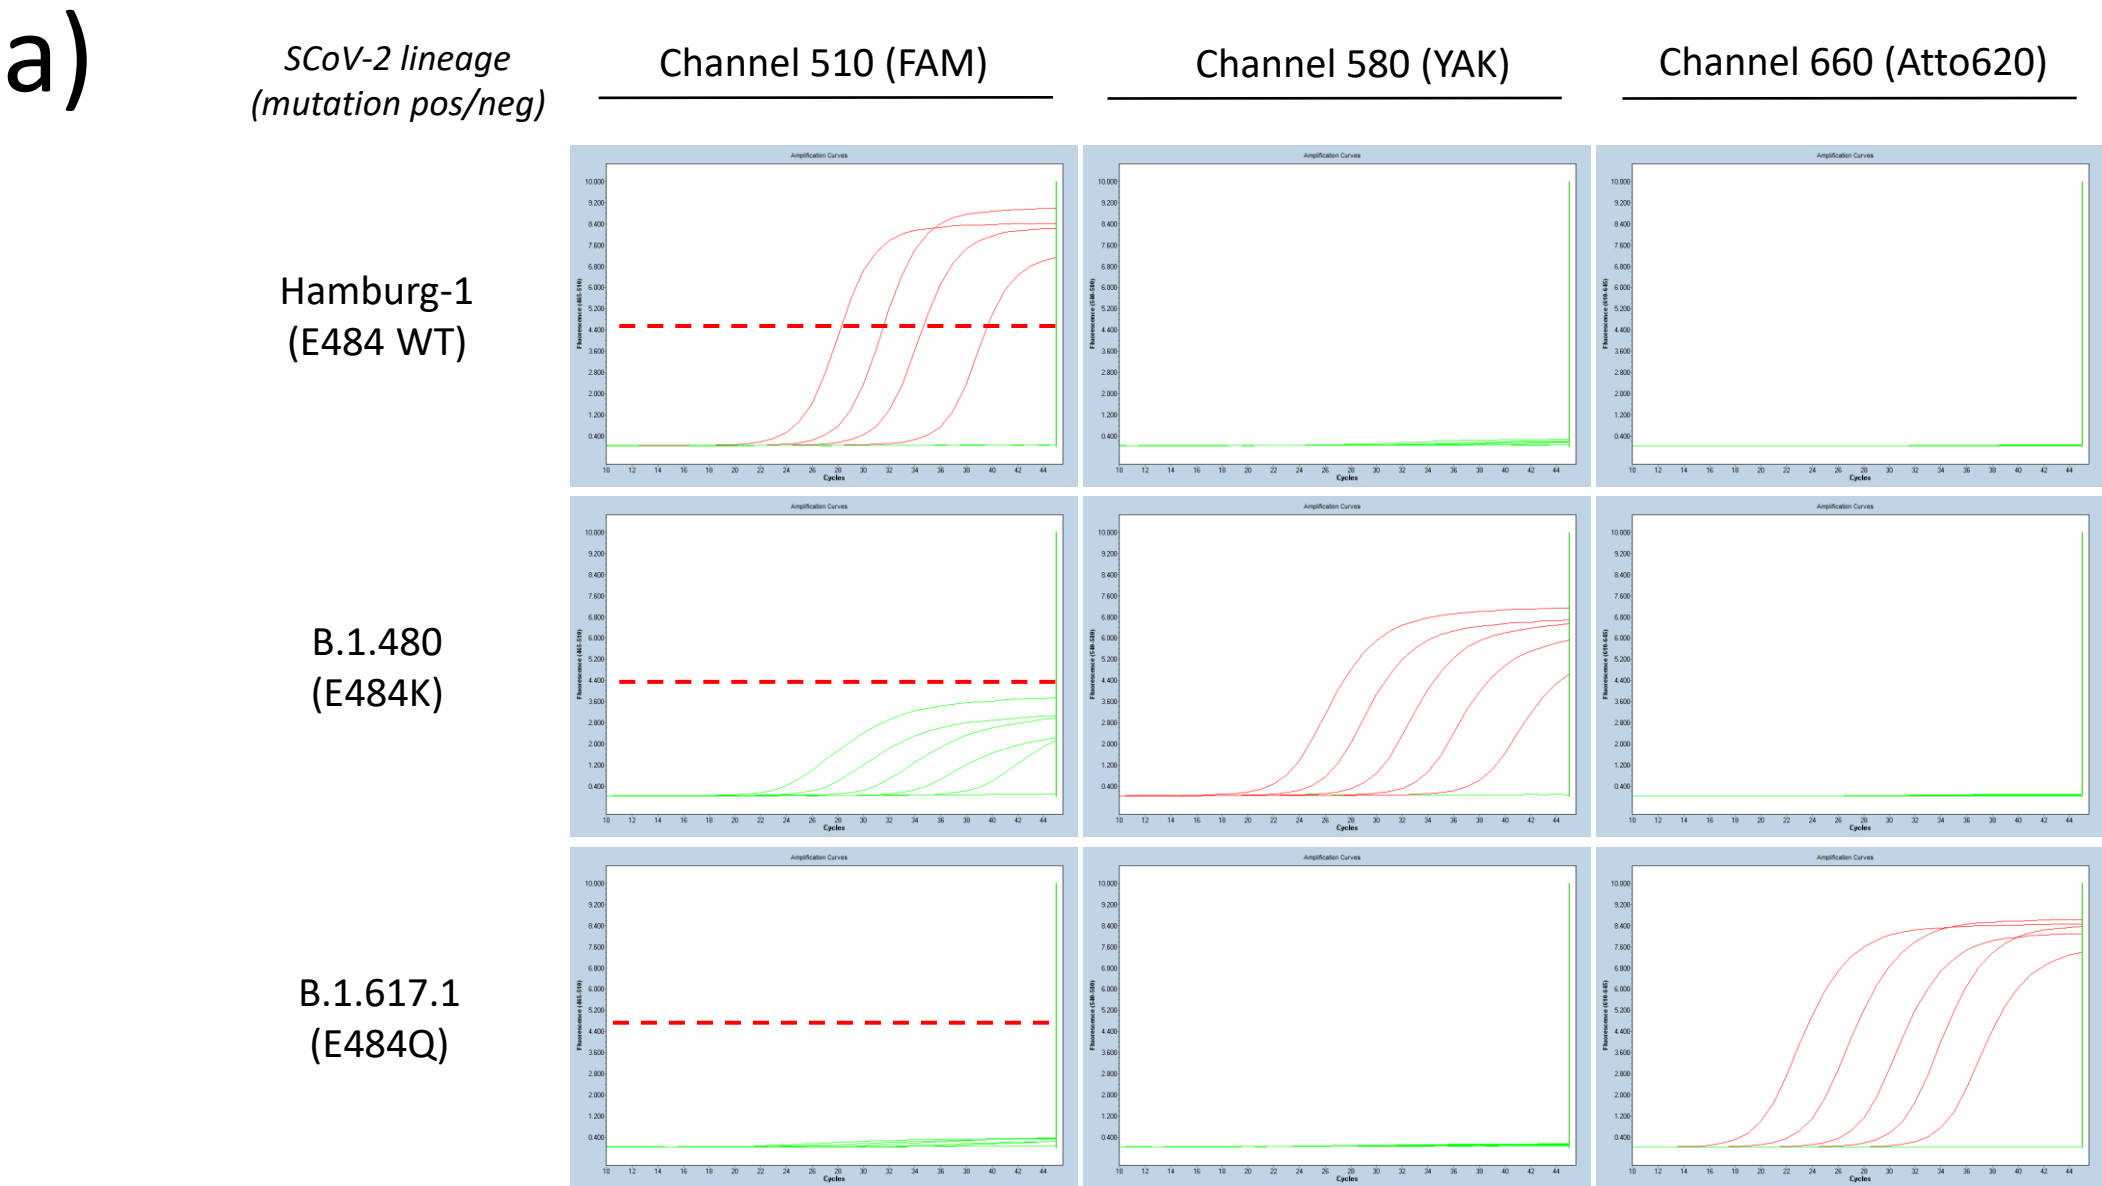

P681H/R Assay (3 probes)

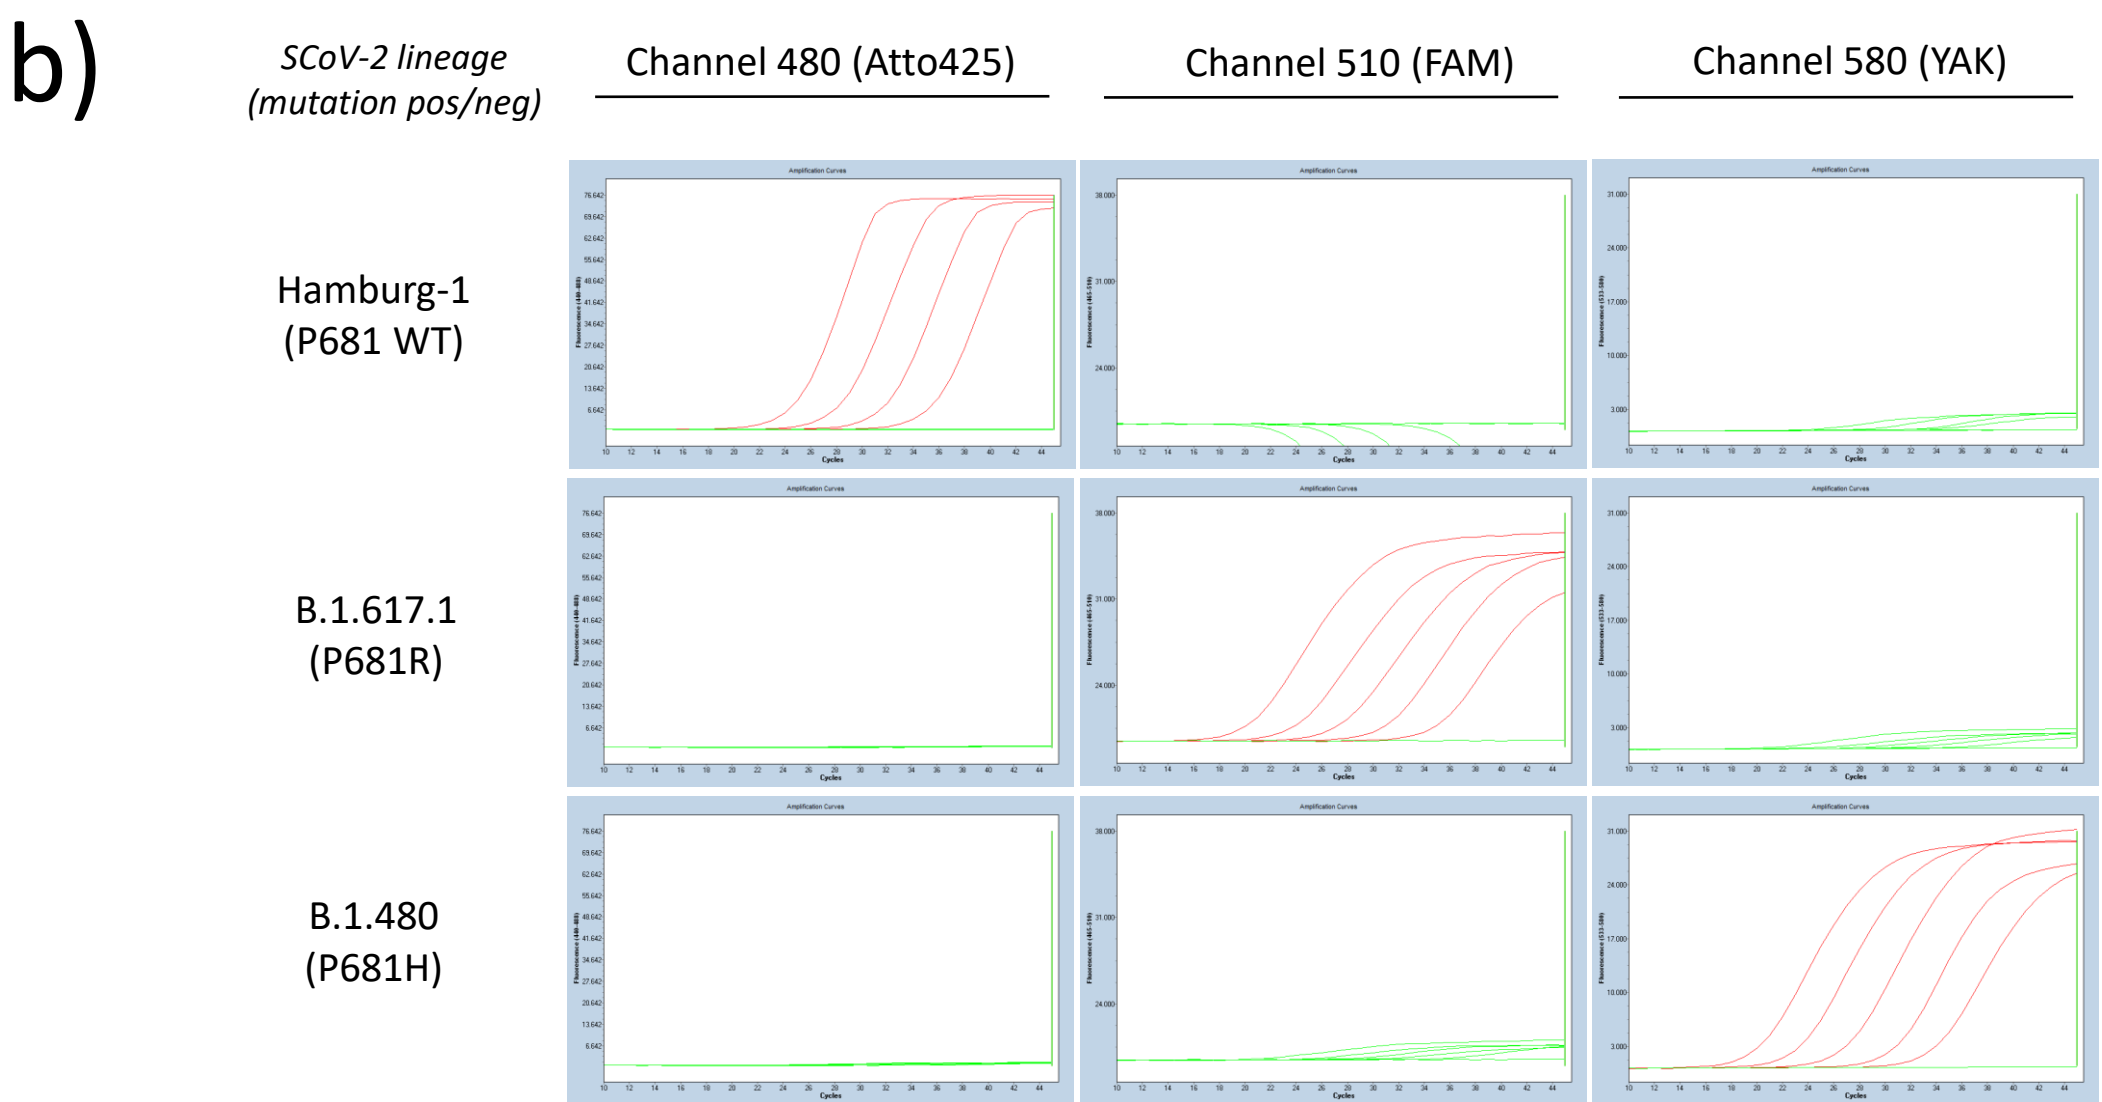

V1176F Assay (2 probes)

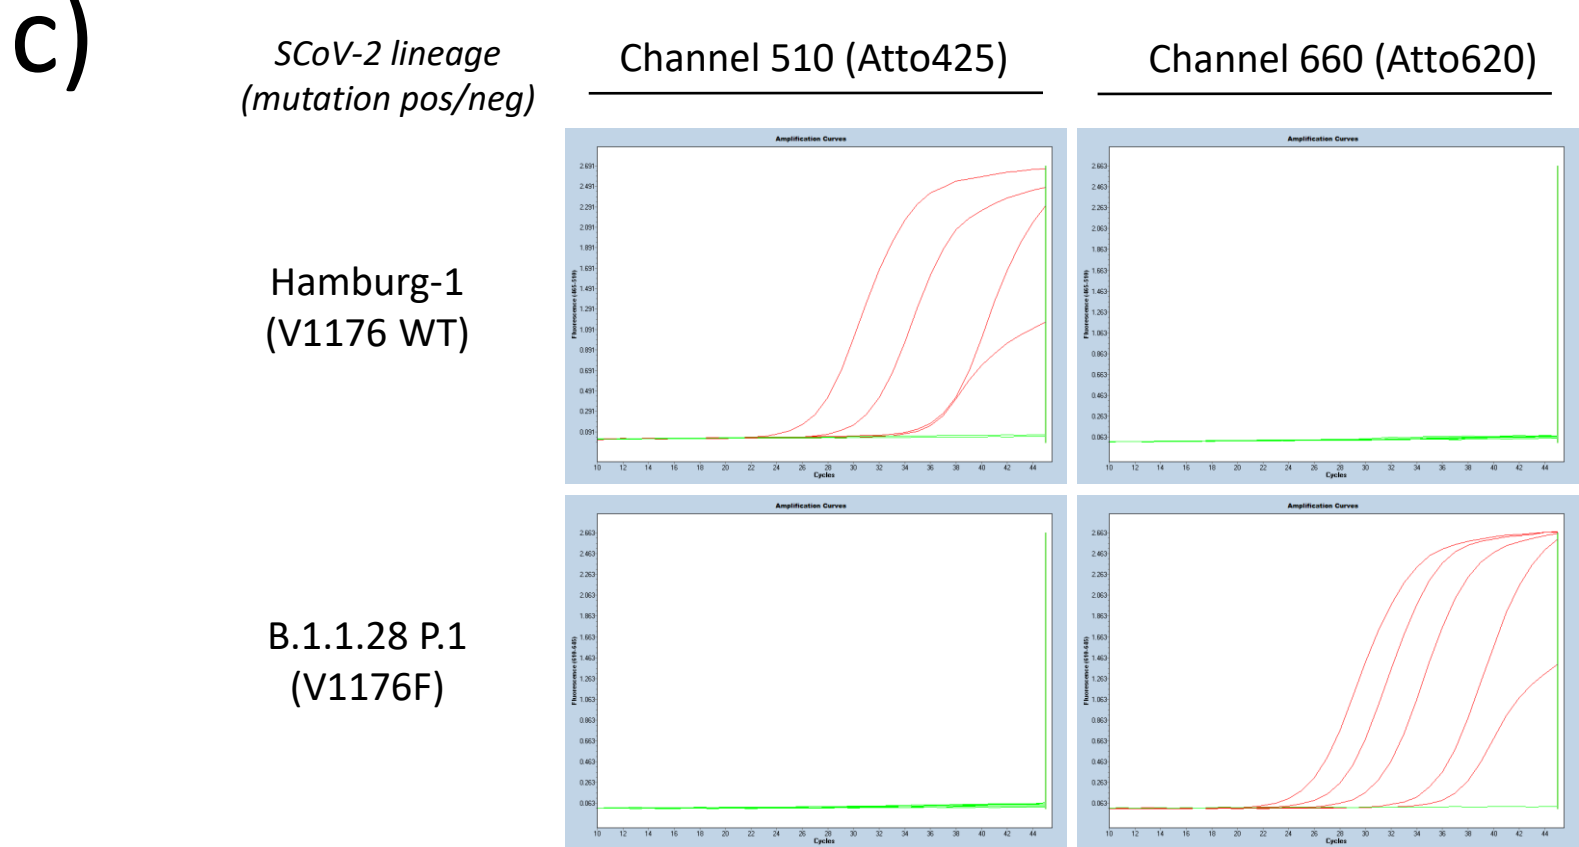

Del-Y144/145 Assay (2 probes)

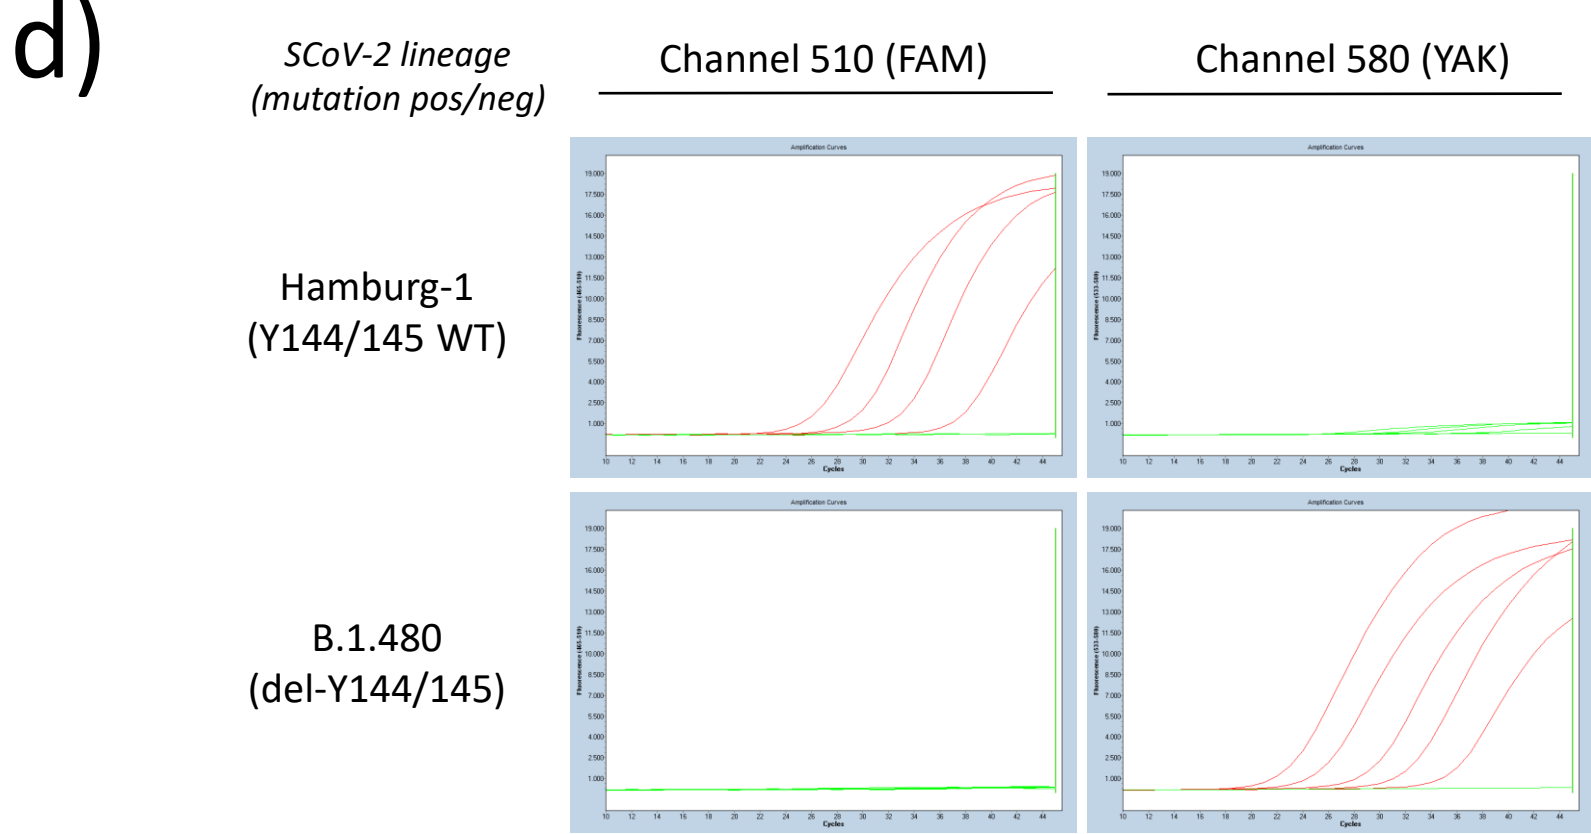

L452R Assay (1 probe)

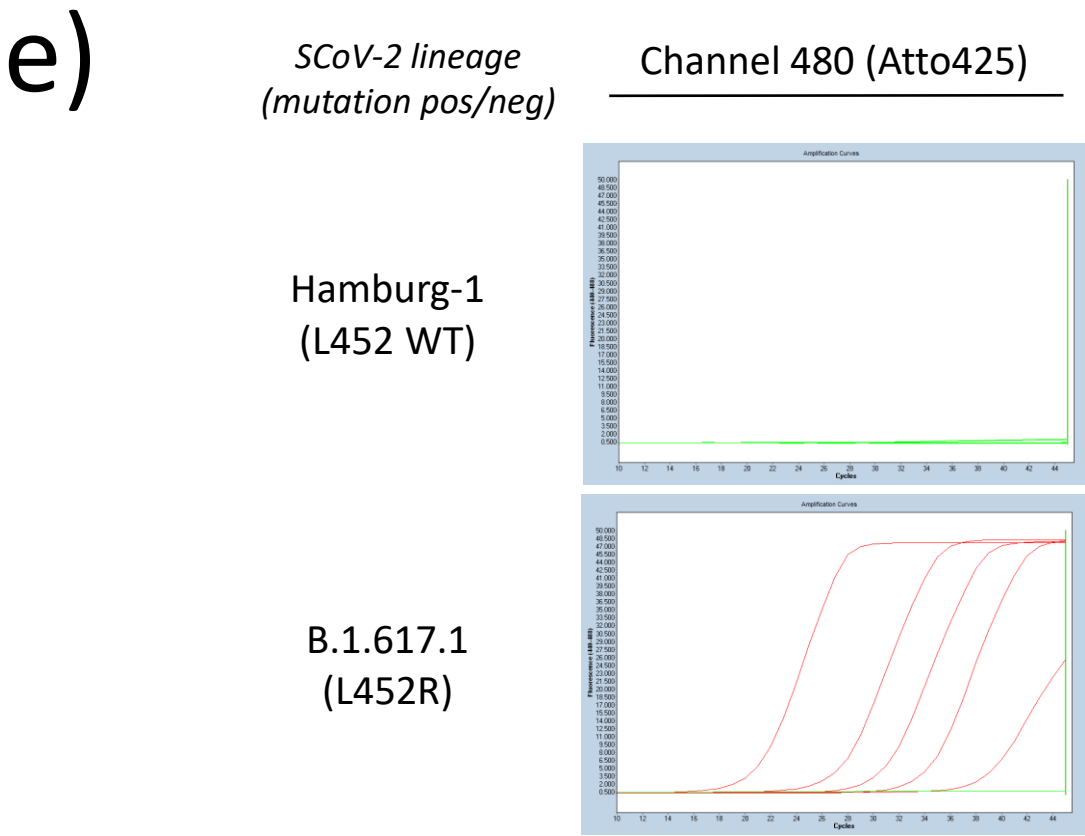

**Supplementary figure S1:**  
Amplification curves of all SNP assays as seen in supplementary table 1. Clinical- or cell culture isolates containing respective SNPs or “ wild-type” sequence were used to create 10-fold dilution series. All assays were tested with cobas omni utility channel kit mastermix and in a total of 3 repeats per dilution step. Nucleic acid extraction was carried out using a MagNA-pure96 instrument (Roche, Switzerland)
