# Supplementary material for: Rapid Automated Screening for SARS-CoV-2 B.1.617 Lineage Variants (Delta/Kappa) through a Versatile Toolset of qPCR-Based SNP Detection
Source: MDPI journal article supplement (doi:10.3390/diagnostics11101818), 2021-10-01
Supplement: s1 [file s1]

Supplementary table S1

| Target-SNP   | Sequences 5' - 3'                                                                                                                                                                                                                                                          | also works with<br>RNA process ctrl kit | Clinical validation |
|--------------|----------------------------------------------------------------------------------------------------------------------------------------------------------------------------------------------------------------------------------------------------------------------------|-----------------------------------------|---------------------|
| del-HV69/70  | Fwd: TCA ACT CAG GAC TTG TTC T(OMe-U)A C<br>Rev: TGG TAG GAC AGG GTT AT(OMe-C) AAA C<br>P-HV69-70WT: TGG TCC CAG AGA CAT GTA TAG CAT<br>P-delHV69-70: TGG TCC CAG A(+G)A T(+A)G C(+A)T                                                                                     | Yes                                     | [15]                |
| N501Y        | Fwd: CCG GTA GCA CAC CTT G(OMe-U)A AT<br>Rev: AGT TGC TGG TGC ATG TA(OMe-G) AA<br>P-N501WT: CC+A (+A)CC CAC (+T)(+A)(+A) TGG T(+G)<br>P-N501Y: CC(+A) (+A)CC CAC (+T)(+T)(+A) TGG T(+G)                                                                                    | Yes                                     | [15]                |
| E484K/Q      | Fwd: CTA TCA GGC CGG TAG (OMe-C)A<br>Rev: GTT GGA AAC CAT ATG ATT GTA AA(OMe-G) G<br>Rev-2: AGT TGC TGG TGC ATG TA(OMe-G) AA<br>P-E484WT: AT(+G) GTG T(+T)(+G) (+A)AG (+G)TT<br>P-E484K: AT(+G) GTG T(+T)(+A) (+A)AG (+G)TT<br>P-E484Q: AT(+G) GTG T(+T)(+C) (+A)AG (+G)TT | Yes                                     | This study          |
| P681H/R      | Fwd: TGC AGG TAT ATG CGC TAG T(OMe-U)A<br>Rev: GTG ACA TAG TGT AGG CAA TGA (OMe-U)G<br>P-P681WT: TAA (+T)TC T(+C)(+C) (+T)CG GCG<br>P-P681H: TAA (+T)TC T(+C)(+A) (+T)CG G(+C)G<br>P-P681R: A(+T)T CT(+C) (+G)(+T)C GGC G                                                  | Yes                                     | This study          |
| L452R        | Fwd: GAT T(+C)T AAG GTT GGT GG(2OMe-U) AAT<br>Rev: TTT CAG TTG AAA TAT CT(+C) TC(2OMe-U) C<br>Rev-2: AGT TGC TGG TGC ATG TA(OMe-G) AA<br>P-L452WT: T(+T)A C(+C)(+T) (+G)TA TAG ATT (+G)TT TA(+G)<br>P-L452R: T(+T)A C(+C)(+G) (+G)TA TAG ATT (+G)TT TA(+G)                 | (Yes)*                                  | This study          |
| V1167F       | Fwd: TAG GTG ACA TCT CTG GCA T(OMe-U)A<br>Rev: CAA GTT CTT GGA GAT CGA T(OMe-G)A G<br>P-V1176WT: TG(+C) TT(+C) (+A)(+G)(+T) TGT AAA CA(+T)<br>P-V1176F: TG(+C) TT(+C) (+A)(+T)(+T) TGT AAA (+C)A(+T)                                                                       | Yes                                     | -                   |
| del-Y144/145 | Fwd: GAC CCA GTC CCT ACT TAT (2OMe-U)G<br>Rev: ACT CTG AAC TCA CTT TC(2OMe-C) AT<br>P-144/145WT: TTT GGG TGT (+T)(+T)(+A) (+T)(+T)(+A) CCA C<br>P-delY144/145: T(+T)T GGG TGT (+T)(+T)(+A) CCA (+C)                                                                        | Yes                                     | -                   |

Various assays (LDTs) for the cobas omni utility channel kit as presented in this and previous studies. Ome-N, 2’O-methyl-RNA base. (+N), Locked nucleic acid base. \* The L452R assay also works with RNA process control kit but CTs were severely delayed.

Supplementary table S2

| cobas omni utility channel kit |            |                  |
|--------------------------------|------------|------------------|
| Step                           | Temp. [°C] | Duration [mm:ss] |
| UNG                            | 50         | 02:00            |
|                                | 95         | 00:05            |
| Pre-PCR                        | 55         | 02:00            |
|                                | 60         | 06:00            |
|                                | 65         | 04:00            |
| PCR1<br>(5 cycles)             | 95         | 00:05            |
|                                | 55         | 00:30            |
| PCR2<br>(45 cycles)            | 91         | 00:05            |
|                                | 58         | 00:25            |
| Cooling                        | 60         | 01:00            |

| Roche one-step RT-PCR Master |            |                  |
|------------------------------|------------|------------------|
| Step                         | Temp. [°C] | Duration [mm:ss] |
| RT                           | 50         | 20:00            |
| Denature                     | 95         | 05:00            |
| Amplification<br>(45 cycles) | 95         | 00:15            |
|                              | 60         | 00:30            |
| Cooling                      | 40         | 00:30            |

LightCycler480 run protocols used for proof-of-concept experiments, see supp. figure 1. Configuration was done within the LightCycler480 software (Roche diagnostics, Switzerland)

Supplementary table S3

| <u>External Quality Control Panel</u>            |               |               |               |               |               |
|--------------------------------------------------|---------------|---------------|---------------|---------------|---------------|
| Species                                          | Number tested | Target: L452R | Target: P681R | Target: E484K | Target: E484Q |
| Influenza A H1N1 pdm09 (A/California/60/2008)    | 1             | Negative      | Negative      | Negative      | Negative      |
| Influenza B Victoria (B/Brisbane/60/2008)        | 1             | Negative      | Negative      | Negative      | Negative      |
| RSV-A                                            | 1             | Negative      | Negative      | Negative      | Negative      |
| RSV-B                                            | 1             | Negative      | Negative      | Negative      | Negative      |
| hCoV - OC43                                      | 1             | Negative      | Negative      | Negative      | Negative      |
| MERS-CoV                                         | 1             | Negative      | Negative      | Negative      | Negative      |
| Parainfluenzavirus-2                             | 1             | Negative      | Negative      | Negative      | Negative      |
| Parainfluenzavirus-3                             | 1             | Negative      | Negative      | Negative      | Negative      |
| Human Metapneumovirus (Subtype A)                | 1             | Negative      | Negative      | Negative      | Negative      |
| Rhinovirus                                       | 1             | Negative      | Negative      | Negative      | Negative      |
| SARS-CoV (Frankfurt-1, cell culture supernatant) | 1             | Negative      | Negative      | Negative      | Negative      |
| <u>Clinical samples</u>                          |               |               |               |               |               |
| Species                                          |               | Target: L452R | Target: P681R | Target: E484K | Target: E484Q |
| hCoV - HKU1                                      | 1             | Negative      | Negative      | Negative      | Negative      |
| hCoV - NL63                                      | 1             | Negative      | Negative      | Negative      | Negative      |
| Adenovirus                                       | 2             | Negative      | Negative      | Negative      | Negative      |
| Boca-virus                                       | 2             | Negative      | Negative      | Negative      | Negative      |
| Parainfluenzavirus 3                             | 1             | Negative      | Negative      | Negative      | Negative      |
| Human Metapneumovirus                            | 2             | Negative      | Negative      | Negative      | Negative      |
| Rhino-/Enterovirus                               | 3             | Negative      | Negative      | Negative      | Negative      |
| Mycoplasma pneumoniae                            | 1             | Negative      | Negative      | Negative      | Negative      |
| Pneumocystis jirovecii                           | 1             | Negative      | Negative      | Negative      | Negative      |

Exclusivity panel tested with the SCOV2-617VOC-UCT. No false positives occurred.
